# Supplementary material for: Stress pinch points from glacial loading modulate magma ascent and storage in continental arcs
Source: Research Square preprint supplement (doi:10.21203/rs.3.rs-7437527/v1), 2025-12-02
Supplement: Supplementary file 2 [file a242c920391af6de92c3e99e.pdf]

**Fig. S2: Dike model results for crust shear modulus of 20 GPa.**

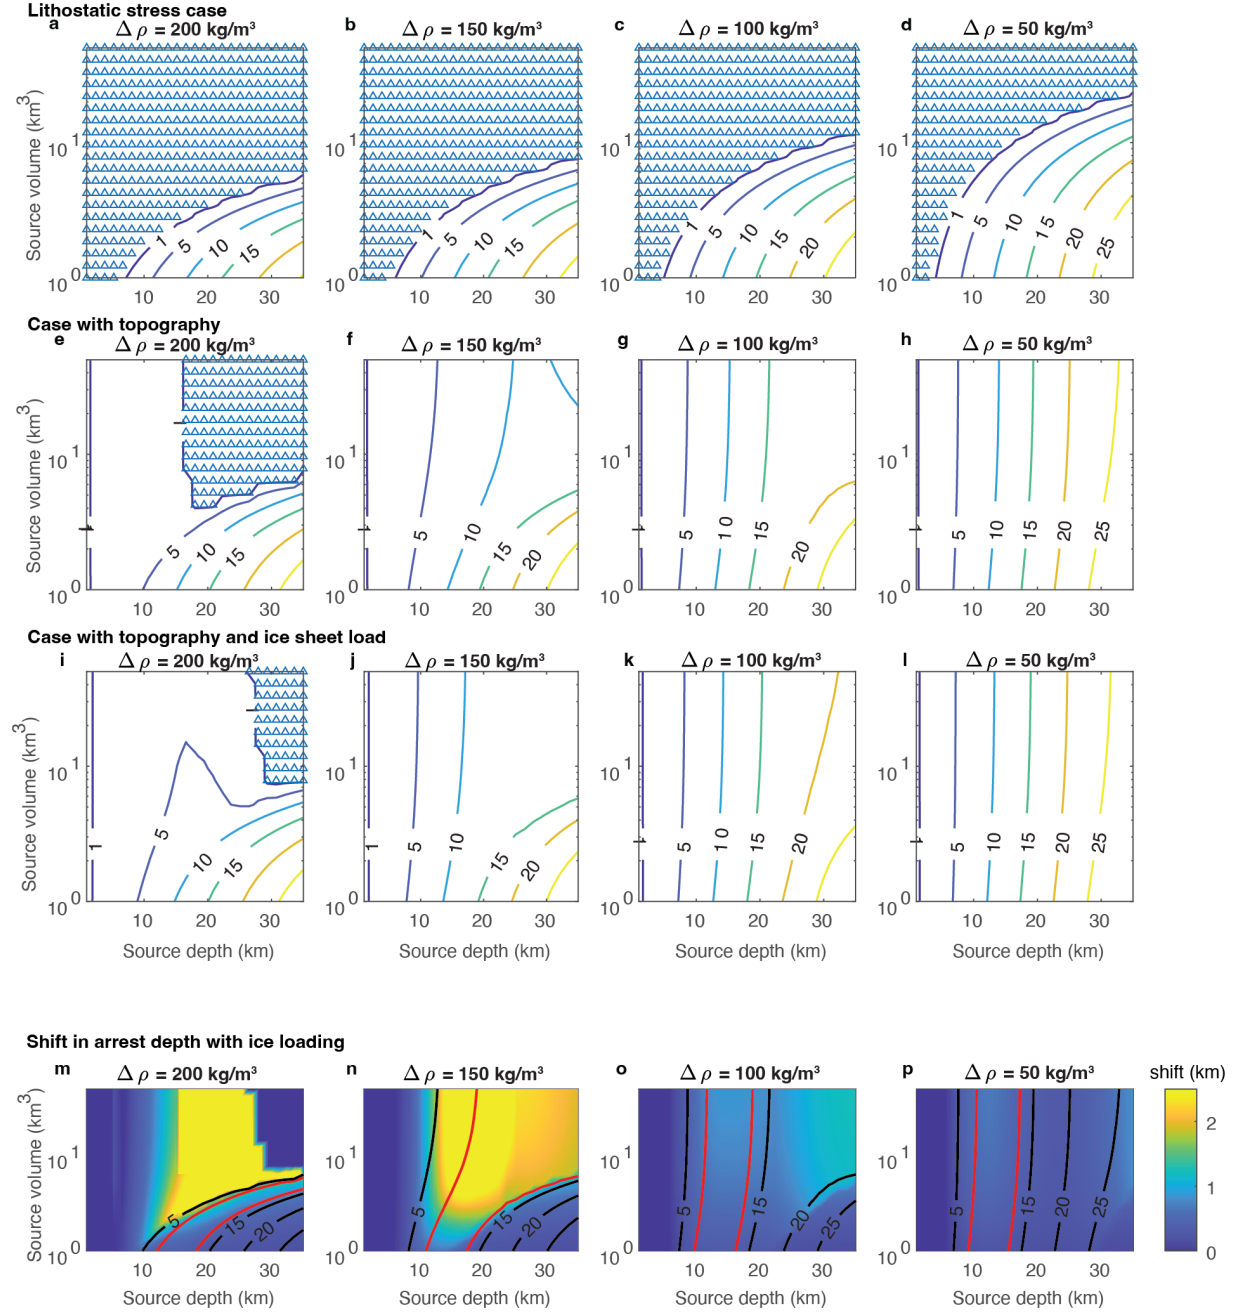

**a-l**, Dike arrest depths in km below msl shown as colored and labeled contours, plotted as a function of source depth and source volume for different crust-magma density contrasts ( $\Delta\rho$ ). Dikes that erupt are shown as open blue triangles. **m-p**, Shift in dike arrest depth in km (positive downward) shown in blue-to-yellow colors as a function of source depth and source volume. Black curves are contours of arrest depths (in km) under ice-free conditions, with red lines representing storage depths at Mocho-Choshuenco (7-13 km) during the pre-LGM period. Parameters used: dike strike = N153,  $\mu = 20 \text{ GPa}$ ,  $r = 1.5 \text{ m}$ ,  $\Delta P_{crit} = 20 \text{ MPa}$ .
